# Supplementary material
Source: PubMed Central journal article supplement (PMC6626703)
Supplement: NIHMS1006661-supplement-Supplemental_figures.pdf [file NIHMS1006661-supplement-Supplemental_figures.pdf]

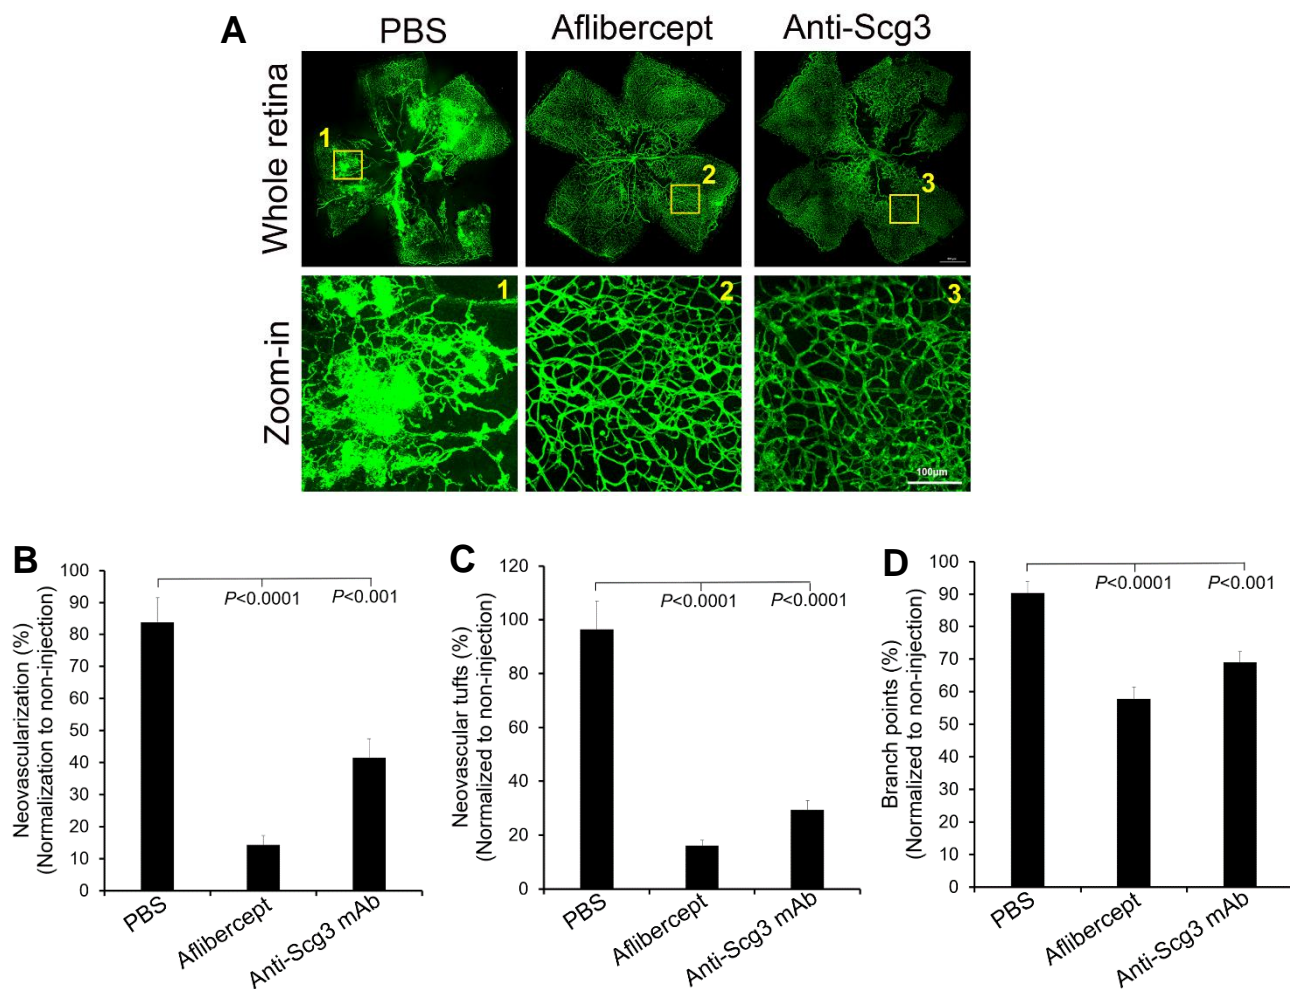

**Supplementary Fig. 1.** Anti-Scg3 mAb to prevent OIR via intraperitoneal injection. Therapeutic agents were injected at P12. **a** Representative images of OIR retina. **b** Quantification of RNV. **c** Quantification of NV tufts. **d** Quantification of branch points. Bar = 100  $\mu$ m (zoom-in).  $n = 11$  eyes (PBS),  $n = 16$  eyes (aflibercept),  $n = 17$  eyes (anti-Scg3 mAb).  $\pm$  SEM, one-way ANOVA test.

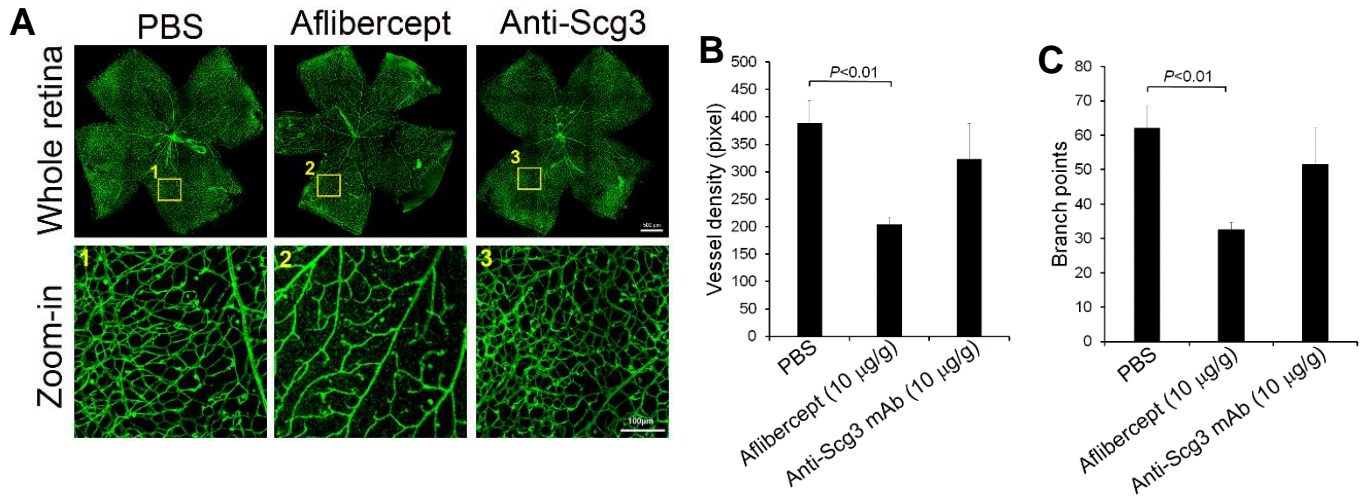

**Supplementary Fig. 2.** Aflibercept, but not anti-Scg3 mAb, inhibits the development of retinal vasculature at P15. Aflibercept (10 mg/Kg body weight) or anti-Scg3 ML78.2 mAb (10 mg/Kg) was intraperitoneally injected into neonatal mice at P3, 5, 7, 9, 11 and 13. At P15, retinas were isolated and analyzed for retinal vasculature as in Fig. 6. **a** Representative images of retinas in the bright field and fluorescent vasculature. **b** Quantification of vessel density. **c** Quantification of branch points.  $n=5$  eyes (PBS), 6 eyes (aflibercept 5 or 10 mg/Kg), 4 eyes (anti-Scg3 mAb).  $\pm$ SEM, one-way ANOVA test.
